# Supplementary material for: RBD spatial orientation of the spike protein and its binding to ACE2: insight into the high infectivity of the SARS-CoV-2 Delta variant from MD simulations
Source: Royal Society of Chemistry journal article supplement (doi:10.1039/d2cp03425e), 2022-01-01
Supplement: d2cp03425e1.pdf [file d2cp03425e1.pdf]

**Electronic Supplementary Information for**

**RBD spatial orientation of the spike protein and its binding to**

**ACE2: insight into high infectivity of SARS-CoV-2 Delta variant**

**from MD simulations**

Nan Lv and Zexing Cao\*

*State Key Laboratory of Physical Chemistry of Solid Surfaces and Fujian Provincial  
Key Laboratory of Theoretical and Computational Chemistry, College of Chemistry  
and Chemical Engineering, Xiamen University, Xiamen 360015, P. R. China*

\*Corresponding Author:

Zexing Cao - Xiamen University, Xiamen 360015, China

orcid.org/0000-0003-0803-7732; Phone: +86-592-2186081

E-mail: [zxcao@xmu.edu.cn](mailto:zxcao@xmu.edu.cn)

## **1. Estimation of the binding free energy by MM/GBSA**

The molecular mechanics generalized Born surface area (MM/GBSA) approach has been widely used in prediction of the binding free energy for the protein folding, protein-ligand binding, protein-protein interaction.<sup>1,2</sup> A variety of GB models are available in Amber software for MM/GBSA calculations.<sup>3</sup> Generally, the first modification model developed by Onufriev et al is the best for the protein-small molecule and protein-protein systems,<sup>4</sup> and thus this model is used to calculate the binding free energy here.

It is worth mentioning that when calculating the interaction of C-RBD with A-RBD, the receptor is the entire complex of protomer A and ACE2, and the ligands are protomers B and C. Since the interaction of protomer B/C with protomer A is not restricted to the B-NTD/C-RBD domain, in calculation of the binding free energy of C-RBD and A-RBD, only the total energy of residues in the range of 402-409, 415-419, 444-458, 471-505 of progenitor C was counted. Similarly, when calculating the binding free energy of B-NTD and A-RBD, only the total energy of residues in the range of 164-171, 229-233 of progenitor B was counted.

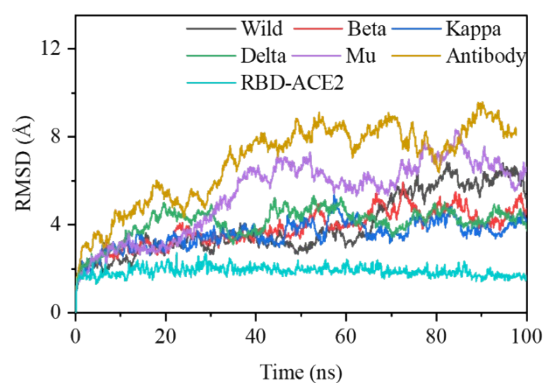

**Figure S1.** The RMSDs from molecular dynamics trajectories for all the systems.

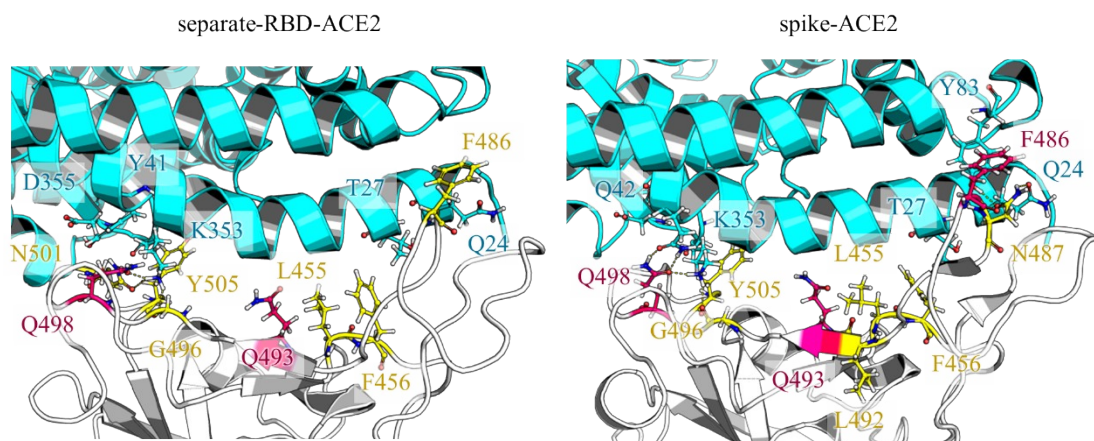

**Figure S2.** Schematic diagram of the residue interaction patterns of separate-RBD-ACE2 (Model 1) and spike-ACE2 (Model 2). The key residues in RBD with the energy contribution greater than 4 kcal/mol are colored red, and those with the energy contribution greater than 2 kcal/mol are colored yellow. The key residues in ACE2 are colored cyan, and there are no key residues in ACE2 with the energy contribution greater than 4 kcal/mol in both models.

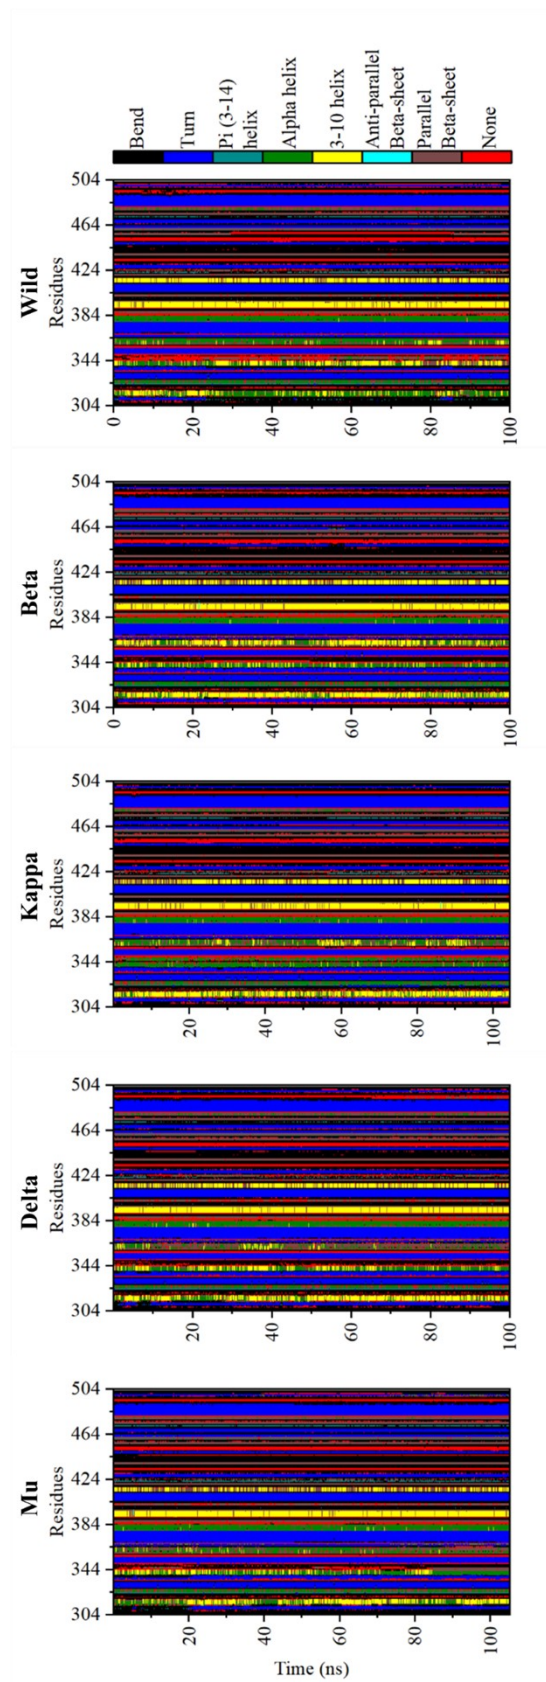

**Figure S3.** DSSP analysis of the RBD domain for all models.

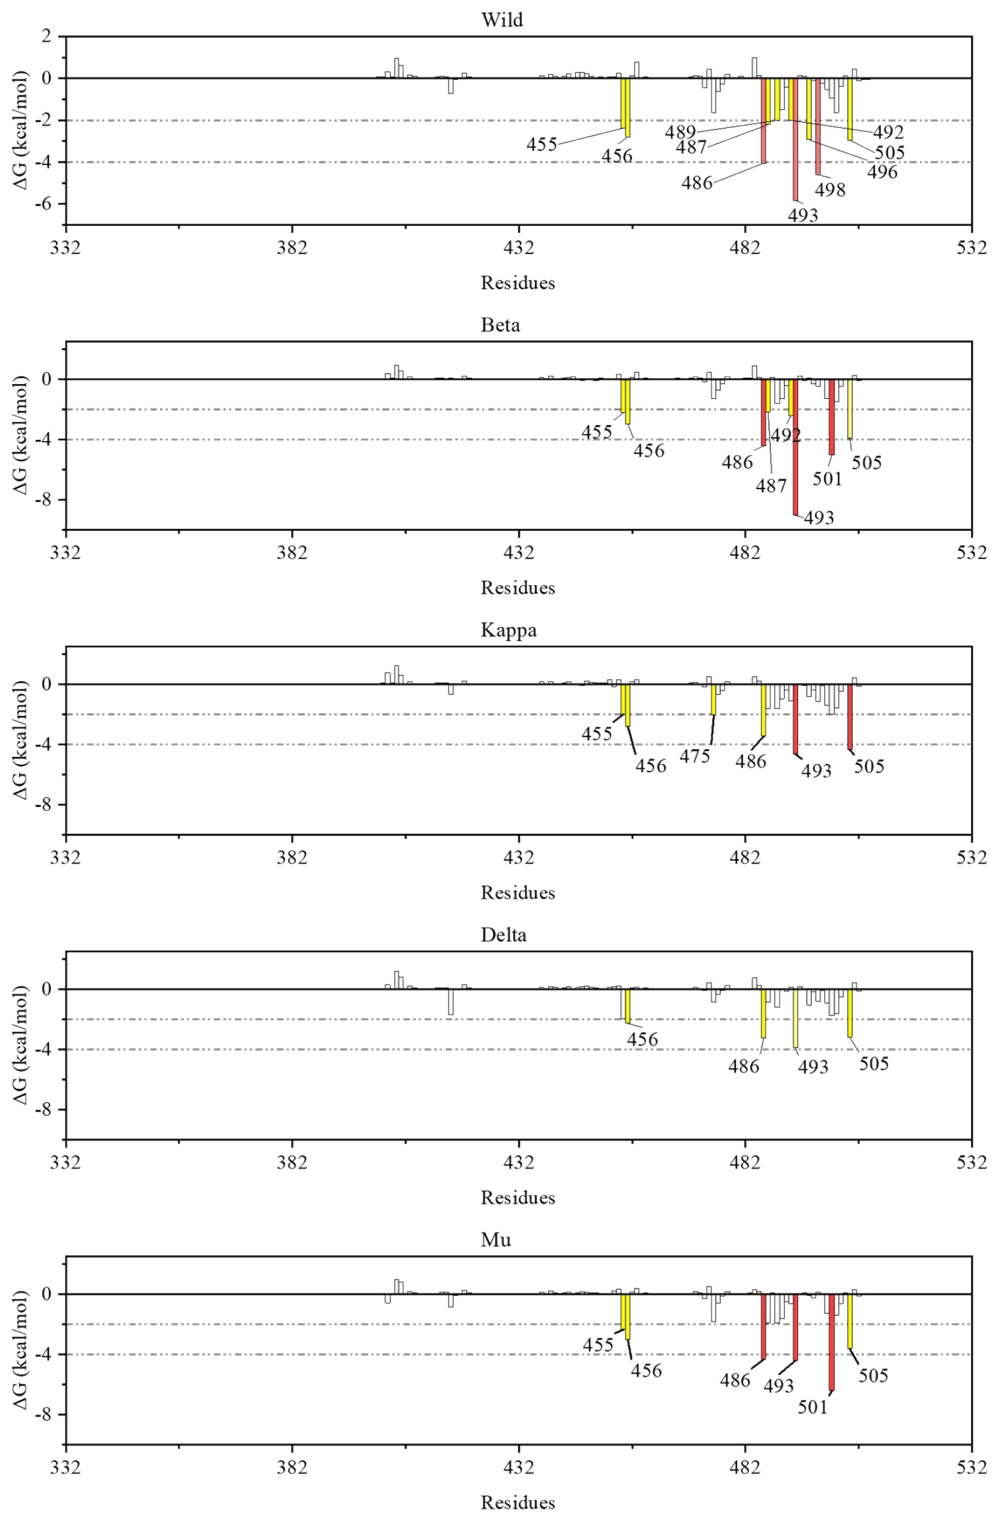

**Figure S4.** Per-residue energy decomposition diagrams of the spike (wild/mutant) RBD-ACE2 complex. A schematic of the protein surface is shown on the right. Residues with the energy contribution below -4 kcal/mol are colored red and those below -2 kcal/mol are colored yellow.

**Table S1. Missing residues in the crystal structure**

| PDB ID | Missing residues                          |
|--------|-------------------------------------------|
| 6lzg   | None                                      |
| 7a94   | 71-75, 625-632, 677-688, 828-852, 941-943 |

**Table S2. Hydrogen bonding analysis of separate-RBD-ACE2 complex (Model 1) and the spike-ACE2 complex (Model 2).**

| Model           | Acceptor <sup>a</sup>    | Donor <sup>a</sup> | Frequency   |      |
|-----------------|--------------------------|--------------------|-------------|------|
| spike-ACE2      | r-ASN_487@OD1            | a-TYR_83@OH        | 0.96        |      |
|                 | a-LYS_353@O              | r-GLY_502@N        | 0.85        |      |
|                 | r-GLN_498@OE1            | a-LYS_353@NZ       | 0.81        |      |
|                 | a-ASP_355@OD2            | r-THR_500@OG1      | 0.80        |      |
|                 | a-TYR_83@OH <sup>b</sup> | r-TYR_489@OH       | 0.78        |      |
|                 | r-GLN_493@OE1            | a-LYS_31@NZ        | 0.74        |      |
|                 | a-GLU_35@OE1(2)          | r-GLN_493@NE2      | 0.72        |      |
|                 | r-GLY_496@O              | a-LYS_353@NZ       | 0.56        |      |
|                 | a-GLN_42@OE1             | r-GLN_498@NE2      | 0.50        |      |
|                 | r-GLN_498@OE1            | a-GLN_42@NE2       | 0.49        |      |
|                 | a-GLN_24@OE1             | r-ASN_487@ND2      | 0.42        |      |
|                 | a-ALA_386@O              | r-TYR_505@OH       | 0.31        |      |
|                 | separate-RBD-ACE2        | r-ASN_487@OD1      | a-TYR_83@OH | 0.81 |
|                 |                          | a-LYS_353@O        | r-GLY_502@N | 0.81 |
| a-GLU_35@OE1(2) |                          | r-GLN_493@NE2      | 0.83        |      |
| r-GLN_498@OE1   |                          | a-LYS_353@NZ       | 0.69        |      |
| a-ASP_355@OD1   |                          | r-THR_500@OG1      | 0.68        |      |
| a-ASP_38@OD2    |                          | r-GLN_498@NE2      | 0.42        |      |
| r-GLY_496@O     |                          | a-LYS_353@NZ       | 0.41        |      |
| r-GLN_493@OE1   |                          | a-LYS_31@NZ        | 0.39        |      |

|              |              |      |
|--------------|--------------|------|
| r-ALA_475@O  | a-SER_19@OG  | 0.35 |
| a-GLU_37@OE2 | r-TYR_505@OH | 0.34 |

<sup>a</sup> "r-" represents the residues of the RBD domain, "a-" represents the residues of the ACE2 protein.

<sup>b</sup> Hydrogen bonds that are not present in both models are marked in red.

**Table S3.** Energy decomposition of key residues in the RBD domain

| Model | Serial | van der Waals | Electrostatic | Polar Solvation | Non-Polar Solv. | Total |
|-------|--------|---------------|---------------|-----------------|-----------------|-------|
| WT    | 493    | -2.21         | -18.84        | 15.84           | -0.61           | -5.82 |
|       | 498    | -1.88         | -9.72         | 7.52            | -0.51           | -4.60 |
|       | 486    | -4.50         | -3.31         | 4.58            | -0.81           | -4.04 |
|       | 505    | -4.17         | -5.48         | 7.52            | -0.82           | -2.95 |
|       | 496    | -0.68         | -4.52         | 2.45            | -0.18           | -2.94 |
|       | 456    | -2.73         | -0.58         | 0.90            | -0.38           | -2.79 |
|       | 455    | -2.83         | 1.46          | -0.74           | -0.27           | -2.37 |
|       | 487    | -1.48         | -6.82         | 6.32            | -0.23           | -2.21 |
|       | 489    | -4.04         | -2.91         | 5.58            | -0.64           | -2.01 |
|       | 492    | 0.06          | -5.40         | 3.35            | -0.01           | -2.00 |
| Beta  | 493    | -2.60         | -25.77        | 20.02           | -0.67           | -9.03 |
|       | 501    | -5.02         | -3.24         | 3.72            | -0.48           | -5.03 |
|       | 486    | -4.90         | -2.94         | 4.25            | -0.83           | -4.42 |
|       | 505    | -4.34         | -5.58         | 6.76            | -0.75           | -3.91 |
|       | 456    | -2.98         | -0.91         | 1.37            | -0.45           | -2.96 |
|       | 492    | 0.13          | -5.91         | 3.34            | 0.00            | -2.44 |
|       | 455    | -2.74         | 1.22          | -0.39           | -0.32           | -2.22 |
|       | 487    | -1.69         | -6.17         | 5.94            | -0.25           | -2.17 |
| Kappa | 493    | -2.04         | -18.17        | 16.17           | -0.61           | -4.64 |
|       | 505    | -5.21         | -6.87         | 8.62            | -0.88           | -4.33 |
|       | 486    | -4.10         | -3.13         | 4.59            | -0.81           | -3.44 |
|       | 456    | -2.80         | -1.10         | 1.48            | -0.38           | -2.80 |
|       | 475    | -1.84         | -6.69         | 6.87            | -0.38           | -2.05 |

|       |     |       |        |       |       |       |
|-------|-----|-------|--------|-------|-------|-------|
|       | 501 | -3.12 | 0.08   | 1.23  | -0.19 | -2.00 |
| Delta | 493 | -1.87 | -18.00 | 16.60 | -0.60 | -3.88 |
|       | 486 | -3.98 | -2.51  | 4.09  | -0.85 | -3.25 |
|       | 505 | -4.49 | -4.87  | 7.00  | -0.82 | -3.17 |
|       | 456 | -2.26 | -0.68  | 1.03  | -0.35 | -2.26 |
|       | 501 | -4.98 | -4.92  | 3.97  | -0.47 | -6.40 |
| Mu    | 493 | -2.01 | -15.93 | 14.06 | -0.54 | -4.41 |
|       | 486 | -4.83 | -2.91  | 4.25  | -0.84 | -4.33 |
|       | 505 | -3.26 | -10.39 | 10.66 | -0.63 | -3.62 |
|       | 456 | -2.85 | -0.50  | 0.68  | -0.36 | -3.04 |
|       | 455 | -2.78 | 1.03   | -0.35 | -0.26 | -2.35 |

**Table S4. The per-residue energy contribution for all system RBD domains**

|         | Single RBD | WT         | Beta       | Kappa      | Delta      | Mu         | Antibody   |
|---------|------------|------------|------------|------------|------------|------------|------------|
| residue | energy     |
| number  | (kcal/mol) |
| 331     | —          | -3.81E-04  | -9.52E-05  | -2.86E-04  | -1.43E-04  | 1.43E-04   | -2.11E-04  |
| 332     | —          | -1.43E-04  | -2.38E-04  | -1.90E-04  | -4.76E-04  | -2.38E-04  | -1.58E-04  |
| 333     | -0.00145   | -1.43E-04  | 4.76E-05   | -4.76E-05  | -2.38E-04  | -9.52E-05  | -2.63E-04  |
| 334     | -2.89E-04  | -1.90E-04  | -1.43E-04  | -3.33E-04  | -1.90E-04  | -4.76E-05  | -4.21E-04  |
| 335     | -5.77E-04  | -3.33E-04  | -5.71E-04  | -1.43E-04  | -2.86E-04  | -5.24E-04  | -4.47E-04  |
| 336     | -2.99E-04  | -9.52E-05  | -6.19E-04  | -4.29E-04  | -1.90E-04  | -4.76E-04  | -2.37E-04  |
| 337     | -4.63E-04  | -7.14E-04  | -6.67E-04  | -2.86E-04  | -2.38E-04  | -2.86E-04  | -9.47E-04  |
| 338     | -1.28E-03  | -8.57E-04  | -1.00E-03  | -7.62E-04  | -5.71E-04  | -0.00114   | -0.00197   |
| 339     | -2.99E-05  | -2.85E-15  | 3.33E-04   | 2.86E-04   | 9.52E-05   | 2.86E-04   | -0.00108   |
| 340     | 0.0051     | 0.00738    | 0.00781    | 0.00867    | 0.00781    | 0.00857    | -0.00408   |
| 341     | 0.00124    | 8.10E-04   | 0.0019     | 0.00219    | 0.00105    | 0.00195    | 0.00303    |
| 342     | -0.00193   | -0.0019    | -0.00219   | -0.00248   | -0.00186   | -0.00162   | 6.05E-04   |
| 343     | -4.03E-04  | -3.81E-04  | -3.33E-04  | 1.90E-04   | -3.33E-04  | -8.57E-04  | 0.00566    |
| 344     | 7.61E-04   | -3.33E-04  | 4.29E-04   | 0.00119    | 5.71E-04   | 0.00152    | 0.01608    |
| 345     | 0.00158    | -4.29E-04  | 0.00186    | 0.00224    | 0.0019     | 0.00333    | 0.06845    |
| 346     | -0.00712   | -0.01043   | -0.00948   | -0.01443   | -0.01676   | -0.01629   | 0.31231    |
| 347     | 0.00802    | 0.00386    | 0.00676    | 0.00638    | 0.00467    | 0.00562    | 0.06355    |
| 348     | 0.00962    | 0.01586    | 0.01071    | 0.012      | 0.00886    | 0.00895    | 0.05253    |
| 349     | 0.01172    | 0.01105    | 0.01476    | 0.00929    | 0.00743    | 0.004      | 0.02889    |
| 350     | 0.02977    | 0.01581    | 0.01671    | 0.02067    | 0.00562    | 0.00514    | 0.01889    |



|     |           |           |           |           |           |           |           |
|-----|-----------|-----------|-----------|-----------|-----------|-----------|-----------|
| 351 | 0.00139   | -0.007    | -0.03876  | -0.00986  | -9.05E-04 | -0.00986  | -0.03795  |
| 352 | 0.00249   | 0.0029    | 0.00276   | 0.00105   | 0.00186   | 0.00333   | 0.02426   |
| 353 | -0.0089   | -0.00667  | -0.01029  | -0.0099   | -0.00671  | -0.00814  | -0.00574  |
| 354 | -0.00175  | -0.00129  | -0.00171  | -0.0021   | -0.00167  | -0.00129  | 0.02918   |
| 355 | -0.00603  | -0.01143  | -0.01181  | -0.01095  | -0.01267  | -0.01443  | 0.01134   |
| 356 | -0.00589  | -0.00986  | -0.00905  | -0.00857  | -0.00895  | -0.00933  | 0.00924   |
| 357 | -0.00264  | -0.00352  | -0.00457  | -0.00405  | -0.00471  | -0.00467  | 0.00403   |
| 358 | -7.16E-04 | -6.67E-04 | -5.24E-04 | -4.76E-04 | -4.76E-04 | -3.81E-04 | -0.00108  |
| 359 | -8.46E-05 | -1.43E-04 | -1.43E-04 | -1.43E-04 | -4.76E-05 | 1.43E-04  | -4.21E-04 |
| 360 | -2.19E-04 | -1.43E-04 | -4.29E-04 | 3.38E-16  | 4.76E-05  | -3.33E-04 | -3.42E-04 |
| 361 | -2.89E-04 | -2.86E-04 | 4.76E-05  | -1.43E-04 | -1.90E-04 | -1.43E-04 | -2.63E-04 |
| 362 | -2.54E-04 | 4.76E-05  | 4.76E-05  | -5.24E-04 | -5.24E-04 | -2.38E-04 | -2.11E-04 |
| 363 | -4.03E-04 | -7.62E-04 | -5.24E-04 | -5.24E-04 | -6.67E-04 | -4.29E-04 | -2.63E-04 |
| 364 | 0.00351   | 0.00524   | 0.00505   | 0.00495   | 0.00476   | 0.0059    | -0.00247  |
| 365 | -1.48E-03 | -5.71E-04 | -5.71E-04 | -5.24E-04 | -3.33E-04 | -3.33E-04 | -8.42E-04 |
| 366 | -3.73E-04 | -1.90E-04 | 1.43E-04  | -1.90E-04 | 2.86E-04  | 4.76E-05  | -4.21E-04 |
| 367 | -3.68E-04 | 4.76E-05  | 2.86E-04  | -4.76E-05 | 1.43E-04  | 3.81E-04  | -2.89E-04 |
| 368 | 2.64E-04  | 4.29E-04  | -6.67E-04 | -7.62E-04 | -7.62E-04 | -5.24E-04 | -5.26E-04 |
| 369 | -8.66E-04 | -0.00214  | -0.00143  | -0.00129  | -0.00129  | -0.00157  | -6.05E-04 |
| 370 | 5.82E-04  | 0.00267   | -1.90E-04 | 9.52E-05  | -2.86E-04 | -9.52E-05 | -3.95E-04 |
| 371 | 0.00296   | 0.013     | 0.00129   | 0.0041    | 2.38E-04  | 0.00329   | -3.95E-04 |
| 372 | 0.01277   | 0.007     | 0.00267   | 0.00986   | 4.29E-04  | 0.0061    | -3.16E-04 |
| 373 | 0.01713   | 0.00424   | 0.02143   | 0.01119   | 0.026     | 0.0359    | -4.74E-04 |
| 374 | 0.01238   | 0.01243   | 0.0099    | 0.01543   | 0.01381   | 0.00967   | -7.11E-04 |
| 375 | 0.04083   | 0.05057   | 0.049     | 0.06829   | 0.04529   | 0.05414   | -0.00103  |
| 376 | 0.02839   | 0.024     | 0.02319   | 0.03667   | 0.02929   | 0.0231    | -0.00121  |
| 377 | -7.16E-04 | -0.00105  | -4.29E-04 | -9.52E-05 | -1.43E-04 | -6.19E-04 | -8.16E-04 |
| 378 | 0.00821   | 0.01448   | 0.01557   | 0.01576   | 0.02462   | 0.00729   | 0.00492   |
| 379 | -1.16E-03 | -3.33E-04 | -7.14E-04 | -3.81E-04 | -4.76E-04 | -2.38E-04 | -2.89E-04 |
| 380 | -0.00339  | -0.00676  | -0.005    | -0.00471  | -0.00562  | -0.00724  | -7.89E-04 |
| 381 | -6.82E-04 | -0.00119  | -0.00129  | -0.00129  | -0.00119  | -0.00124  | -2.63E-05 |
| 382 | -5.32E-04 | -3.81E-04 | -4.76E-04 | -4.76E-04 | -4.76E-05 | -2.38E-04 | -3.68E-04 |
| 383 | -6.62E-04 | -3.33E-04 | -4.76E-04 | -4.76E-04 | -4.76E-04 | -5.24E-04 | -1.32E-04 |
| 384 | -0.00155  | -0.00233  | -0.00214  | -0.00171  | -0.0019   | -0.00238  | -2.11E-04 |
| 385 | -6.87E-04 | -9.05E-04 | -5.71E-04 | -0.00124  | -6.67E-04 | -0.00105  | 5.26E-05  |
| 386 | -0.00346  | -0.00443  | -0.00467  | -0.00395  | -0.00452  | -0.00519  | 7.63E-04  |
| 387 | -6.27E-04 | -0.00129  | -0.00114  | -8.57E-04 | -5.71E-04 | -0.00114  | -5.26E-05 |
| 388 | -4.68E-04 | -6.67E-04 | -9.52E-04 | -5.71E-04 | -1.43E-04 | -4.29E-04 | -1.05E-04 |
| 389 | 0.00153   | 0.00224   | 0.00257   | 0.00233   | 0.00238   | 0.00267   | -8.16E-04 |
| 390 | -4.33E-04 | -8.57E-04 | -4.29E-04 | -5.24E-04 | -5.24E-04 | -5.71E-04 | -2.89E-04 |
| 391 | -2.29E-04 | -4.29E-04 | -4.76E-04 | -3.81E-04 | 9.52E-05  | -2.38E-04 | -1.05E-04 |
| 392 | -6.32E-04 | -5.24E-04 | -9.52E-04 | -4.76E-04 | -3.81E-04 | -9.05E-04 | -1.84E-04 |
| 393 | -3.53E-04 | -4.29E-04 | -5.71E-04 | -3.81E-04 | -6.67E-04 | -3.33E-04 | -7.89E-05 |
| 394 | -4.48E-04 | -6.19E-04 | -1.43E-04 | -3.81E-04 | -3.81E-04 | -3.81E-04 | 1.05E-04  |

|     |           |           |           |           |           |           |           |
|-----|-----------|-----------|-----------|-----------|-----------|-----------|-----------|
| 395 | -3.03E-04 | -3.33E-04 | 4.76E-05  | -9.52E-05 | 4.76E-05  | -3.33E-04 | -5.26E-05 |
| 396 | -9.20E-04 | -8.10E-04 | -9.05E-04 | -1.00E-03 | -8.10E-04 | -9.05E-04 | -5.79E-04 |
| 397 | 6.02E-04  | 5.71E-04  | 2.38E-04  | 8.57E-04  | 4.76E-04  | 4.29E-04  | 8.68E-04  |
| 398 | 0.0052    | 0.01271   | 0.01319   | 0.01105   | 0.01362   | 0.01629   | -0.00968  |
| 399 | 0.003     | 0.00219   | 0.00271   | 0.00329   | 0.00129   | 0.00176   | 0.00766   |
| 400 | -0.00286  | -0.00462  | -0.01071  | -0.00443  | -0.00657  | -0.01005  | 0.00979   |
| 401 | 0.05866   | 0.06695   | 0.03648   | 0.05771   | 0.04476   | 0.0329    | 0.03279   |
| 402 | 0.07432   | 0.07652   | 0.0351    | 0.06476   | 0.051     | 0.026     | 0.01505   |
| 403 | 0.45037   | 0.30701   | 0.39639   | 0.69759   | 0.30305   | -0.58279  | 0.09095   |
| 404 | 0.05991   | 0.063     | 0.07476   | 0.10271   | 0.07233   | 0.06543   | 1.58E-04  |
| 405 | 0.90471   | 0.9595    | 0.94895   | 1.01716   | 1.2023    | 0.99475   | -0.01674  |
| 406 | 0.55624   | 0.61      | 0.57386   | 0.70131   | 0.80164   | 0.81976   | 0.01032   |
| 407 | 0.01802   | 0.02281   | 0.02224   | 0.01548   | 0.01976   | 0.02948   | -6.84E-04 |
| 408 | 0.2231    | 0.18017   | 0.18393   | 0.14728   | 0.23819   | 0.19433   | 0.01882   |
| 409 | 0.08149   | 0.09462   | 0.05533   | 0.07652   | 0.08905   | 0.09148   | 0.00221   |
| 410 | 2.94E-04  | -2.38E-04 | 7.62E-04  | 0.00176   | 0.00248   | 0.0011    | -0.00161  |
| 411 | 4.98E-04  | 0.00119   | 0.00352   | 2.38E-04  | 0.00281   | 0.00414   | -0.00142  |
| 412 | -4.63E-04 | 0.00167   | 6.67E-04  | 0.00271   | 0.00314   | 0.0039    | -0.00105  |
| 413 | 0.01513   | 0.01614   | 0.01157   | 0.01348   | 0.00533   | 0.01157   | -2.37E-04 |
| 414 | 0.08052   | 0.06657   | 0.0879    | 0.08048   | 0.09124   | 0.05457   | -6.84E-04 |
| 415 | 0.098     | 0.09819   | 0.10757   | 0.10819   | 0.10714   | 0.12      | 0.00163   |
| 416 | 0.11474   | 0.07343   | 0.05576   | 0.09243   | 0.09619   | 0.12533   | 0.00424   |
| 417 | -0.83729  | -0.7188   | 0.11343   | -1.26789  | -1.71191  | -0.8434   | 0.11553   |
| 418 | -0.05745  | -0.05919  | -0.03857  | -0.03757  | -0.04433  | -0.0601   | -0.01205  |
| 419 | 0.00264   | 0.00729   | 0.01157   | 0.00276   | 9.05E-04  | 0.00967   | 2.63E-05  |
| 420 | 0.17511   | 0.25943   | 0.23729   | 0.2349    | 0.30033   | 0.27776   | -0.01513  |
| 421 | 0.09132   | 0.07574   | 0.11471   | 0.07505   | 0.08489   | 0.07958   | 0.01132   |
| 422 | 0.03863   | 0.04638   | 0.05143   | 0.03886   | 0.0349    | 0.04562   | 0.01484   |
| 423 | 7.06E-04  | 0.00362   | 0.00243   | 6.67E-04  | 0.0051    | 0.00571   | -0.00579  |
| 424 | 0.05381   | 0.04795   | 0.04129   | 0.04238   | 0.04252   | 0.05062   | 0.01405   |
| 425 | 5.57E-04  | 0.00157   | 0.00119   | 0.00233   | 0.00214   | 0.00281   | -0.00124  |
| 426 | -0.00519  | -0.00524  | -0.00557  | -0.00552  | -0.0049   | -0.00557  | -0.00211  |
| 427 | 0.00623   | 0.01238   | 0.02038   | 0.0189    | 0.02524   | 0.02981   | -0.00689  |
| 428 | 0.00147   | 0.00529   | 0.00629   | 0.00505   | 0.00695   | 0.00738   | -0.00358  |
| 429 | -0.0042   | -0.00414  | -0.005    | -0.00505  | -0.00538  | -0.00519  | -0.00108  |
| 430 | -6.62E-04 | -4.29E-04 | -6.67E-04 | -4.29E-04 | -3.81E-04 | -3.33E-04 | -2.37E-04 |
| 431 | 9.45E-05  | 1.43E-04  | 1.43E-04  | 3.33E-04  | 3.33E-04  | 1.90E-04  | 2.63E-04  |
| 432 | 8.86E-04  | 0.00114   | 0.00148   | 0.00214   | 8.57E-04  | 0.0011    | 2.63E-04  |
| 433 | 0.00342   | 0.00462   | 0.00457   | 0.005     | 0.00295   | 0.00348   | 0.00155   |
| 434 | 3.08E-04  | 4.76E-04  | 0.00105   | 0.00248   | 4.29E-04  | 7.62E-04  | -0.00179  |
| 435 | 0.00942   | 0.00629   | 0.00757   | 0.00943   | 0.00705   | 0.006     | 0.00232   |
| 436 | 0.00928   | 0.00876   | 0.00371   | 0.01233   | 0.00533   | 0.00638   | -0.001    |
| 437 | 0.16653   | 0.13966   | 0.13218   | 0.17586   | 0.13671   | 0.15705   | 0.01666   |
| 438 | 0.0041    | 0.0071    | -1.90E-04 | 0.00919   | 0.01105   | 0.00838   | -0.01274  |

|     |          |          |           |           |          |          |           |
|-----|----------|----------|-----------|-----------|----------|----------|-----------|
| 439 | 0.23023  | 0.20405  | 0.21558   | 0.1951    | 0.19829  | 0.22843  | 0.04466   |
| 440 | 0.10398  | 0.10852  | 0.05405   | 0.08481   | 0.12829  | 0.10905  | 0.06561   |
| 441 | 0.04552  | 0.04043  | 0.03552   | 0.04376   | 0.03852  | 0.03186  | 0.04982   |
| 442 | 0.09082  | 0.08986  | 0.07876   | 0.10138   | 0.09343  | 0.09519  | -2.89E-04 |
| 443 | 0.12358  | 0.24086  | 0.11814   | 0.20048   | 0.17295  | 0.11743  | 0.15016   |
| 444 | 0.13756  | 0.0369   | 0.18662   | 0.04852   | 0.05381  | 0.06967  | -0.76003  |
| 445 | 0.16505  | 0.29673  | 0.0625    | 0.00746   | 0.12944  | 0.11515  | 0.04848   |
| 446 | 0.09335  | 0.27919  | -0.05646  | -0.09429  | 0.16062  | 0.19422  | 0.24869   |
| 447 | 0.23644  | 0.21855  | 0.04138   | 0.23333   | 0.22436  | 0.12843  | -1.05371  |
| 448 | 0.0541   | 0.10924  | 0.07257   | 0.144     | 0.12986  | 0.0869   | -1.58152  |
| 449 | -0.86713 | 0.00501  | -0.0786   | 0.04848   | 0.08228  | 0.11011  | -5.04708  |
| 450 | 0.1019   | 0.08314  | 0.08162   | 0.07943   | 0.06486  | 0.06371  | -2.15832  |
| 451 | 0.01259  | 0.04143  | 0.03095   | 0.07186   | 0.06324  | 0.04276  | 0.01279   |
| 452 | 0.05424  | 0.08881  | 0.06852   | 0.30233   | 0.14453  | 0.04433  | -1.1207   |
| 453 | -0.17113 | 0.08467  | -0.03864  | 0.15071   | 0.17155  | 0.23863  | -0.08074  |
| 454 | 0.28249  | 0.24519  | 0.35048   | 0.30776   | 0.22367  | 0.36281  | 0.28239   |
| 455 | -2.06835 | -2.3712  | -2.22481  | -2.15846  | -1.97899 | -2.35446 | 0.02663   |
| 456 | -2.15825 | -2.79249 | -2.96262  | -2.71346  | -2.25838 | -3.03773 | 0.01997   |
| 457 | 0.17328  | 0.14862  | 0.15313   | 0.17208   | 0.10671  | 0.15581  | 0.07139   |
| 458 | 0.2844   | 0.78084  | 0.49215   | 0.14909   | 0.14003  | 0.40044  | 0.06958   |
| 459 | 0.02312  | 0.0211   | 0.02138   | 0.02581   | 0.01648  | 0.01605  | -0.00321  |
| 460 | 0.06685  | 0.08557  | 0.09324   | 0.06776   | 0.11038  | 0.111    | 0.00576   |
| 461 | 0.00549  | 0.00619  | 0.01062   | 0.00919   | 0.00633  | 0.0091   | 0.00329   |
| 462 | 0.00363  | 0.00129  | -0.00186  | -9.52E-05 | -0.00738 | 0.00143  | 0.00982   |
| 463 | -0.00148 | -0.0021  | -0.00233  | -0.00167  | -0.00205 | -0.00195 | -3.95E-04 |
| 464 | -0.00186 | -0.0031  | -0.00386  | -0.0031   | -0.00352 | -0.00414 | -9.00E-16 |
| 465 | 0.00865  | 0.0271   | 0.02595   | 0.02214   | 0.03148  | 0.03157  | -0.01013  |
| 466 | 1.40E-02 | -0.00119 | -1.43E-04 | 0.00548   | -0.00519 | -0.006   | 0.08808   |
| 467 | 0.01426  | -0.00381 | 0.07681   | 0.02819   | 0.02462  | -0.01581 | 0.00332   |
| 468 | 0.00929  | 0.003    | 0.0109    | 0.00824   | 0.002    | 0.00467  | 0.04503   |
| 469 | 5.07E-04 | 0.05081  | 0.01771   | 0.04281   | 0.02943  | 0.0399   | 0.05216   |
| 470 | 0.06337  | 0.06276  | 0.093     | 0.0719    | 0.05652  | 0.06005  | 0.0209    |
| 471 | 0.09064  | 0.14486  | 0.16724   | 0.1249    | 0.12352  | 0.17557  | 0.25834   |
| 472 | 0.04129  | 0.09995  | 0.07586   | 0.05871   | 0.03943  | 0.10324  | -0.4397   |
| 473 | -0.00246 | -0.44322 | -0.14582  | -0.13398  | -0.09603 | -0.30304 | -0.00474  |
| 474 | 0.5292   | 0.43366  | 0.45705   | 0.59041   | 0.43548  | 0.52043  | 0.08511   |
| 475 | -1.63128 | -1.63942 | -1.2897   | -2.23954  | -0.85374 | -1.83257 | 0.02482   |
| 476 | -0.48078 | -0.61331 | -0.71309  | -0.63403  | -0.32161 | -0.58074 | 0.02647   |
| 477 | -0.29646 | -0.2504  | -0.27601  | -0.2132   | -0.05655 | -0.11257 | 0.03718   |
| 478 | 0.21845  | 0.192    | 0.18973   | 0.21567   | 0.26247  | 0.1739   | 0.10792   |
| 479 | 0.04004  | 0.03967  | 0.06243   | 0.05029   | 0.04667  | 0.05557  | 0.12013   |
| 480 | 0.02303  | 0.01524  | 0.01629   | 0.0049    | 0.00838  | 0.01043  | 0.14716   |
| 481 | 0.08901  | 0.09714  | 0.07081   | 0.06043   | 0.05395  | 0.06081  | 0.3813    |
| 482 | 0.05747  | 0.05567  | 0.07848   | 0.05638   | 0.05148  | 0.06857  | 0.25918   |

|     |           |           |           |           |           |           |           |
|-----|-----------|-----------|-----------|-----------|-----------|-----------|-----------|
| 483 | 0.05807   | 0.05781   | 0.08452   | 0.07067   | 0.04505   | 0.08876   | -2.76312  |
| 484 | 0.84614   | 0.98955   | 0.90444   | 0.43575   | 0.75958   | 0.29329   | -3.32576  |
| 485 | 0.20292   | 0.14607   | 0.15317   | 0.23565   | 0.27234   | 0.18347   | -0.08542  |
| 486 | -3.82353  | -4.04292  | -4.41666  | -3.50107  | -3.24633  | -4.32962  | -0.32485  |
| 487 | -1.32597  | -2.20791  | -2.16618  | -1.66864  | -0.85287  | -1.93459  | 0.13108   |
| 488 | 0.0612    | 0.02962   | 0.11833   | 0.0669    | 0.03957   | 0.09981   | 0.03384   |
| 489 | -1.14687  | -2.00862  | -1.62646  | -1.42674  | -1.18843  | -1.90161  | 0.13078   |
| 490 | 0.05713   | -1.48937  | -1.28474  | -0.63079  | 0.02413   | -1.60536  | -3.43542  |
| 491 | -0.13328  | -0.41257  | -0.42671  | -0.31505  | -0.1359   | -0.50224  | -0.22034  |
| 492 | 0.1139    | -2.00086  | -2.44256  | -0.88666  | 0.11674   | -0.62813  | -0.19071  |
| 493 | -4.55598  | -5.82158  | -9.02663  | -4.57771  | -3.875    | -4.40987  | 0.17209   |
| 494 | 0.39998   | 0.1494    | 0.22559   | 0.14706   | 0.18532   | 0.06539   | -0.17651  |
| 495 | -0.19028  | 0.10741   | -0.09059  | -0.02281  | -0.02176  | 0.07531   | 0.02474   |
| 496 | -2.07595  | -2.93525  | 0.09558   | -0.92229  | -1.04068  | -0.06571  | 0.06732   |
| 497 | -0.38087  | -0.10462  | -0.29376  | -0.35371  | -0.16938  | -0.238    | -0.23303  |
| 498 | -6.17336  | -4.59987  | -0.44085  | -1.12713  | -0.7749   | 0.13703   | 0.22182   |
| 499 | -0.19581  | -0.2297   | -0.03515  | -0.07735  | -0.07623  | 0.00654   | -0.01589  |
| 500 | -0.80882  | -0.52327  | -1.26204  | -1.41992  | -0.90678  | -1.28147  | 0.04789   |
| 501 | -3.88672  | -0.95696  | -5.02587  | -1.98487  | -1.75762  | -6.40497  | 0.08655   |
| 502 | -1.71101  | -1.63859  | -1.49097  | -1.55511  | -1.60407  | -1.38979  | -0.01334  |
| 503 | -0.36386  | -0.38541  | -0.44956  | -0.40696  | -0.49907  | -0.62477  | -2.89E-04 |
| 504 | 0.12245   | 0.13058   | 0.05435   | 0.03402   | 0.06969   | 0.10209   | 0.00363   |
| 505 | -3.68303  | -2.95146  | -3.90673  | -4.36109  | -3.17128  | -3.61858  | 0.04774   |
| 506 | 0.43987   | 0.45429   | 0.2647    | 0.45069   | 0.43375   | 0.3215    | 0.05692   |
| 507 | -0.15616  | -0.12414  | -0.09029  | -0.13205  | -0.11219  | -0.10267  | -0.01518  |
| 508 | -0.04436  | -0.03405  | -0.0231   | -0.0511   | -0.02681  | -0.01776  | -0.01371  |
| 509 | -0.0255   | -0.0351   | -0.03167  | -0.039    | -0.03729  | -0.03324  | 0.05989   |
| 510 | 7.41E-04  | 0.002     | 5.24E-04  | 0.0021    | 4.76E-04  | 7.62E-04  | -1.84E-04 |
| 511 | -7.31E-04 | -2.86E-04 | -5.24E-04 | -8.10E-04 | -8.10E-04 | 8.57E-04  | -2.63E-04 |
| 512 | -2.44E-04 | -4.29E-04 | -2.38E-04 | 1.43E-04  | 1.43E-04  | 2.86E-04  | -4.21E-04 |
| 513 | -0.00194  | -0.00143  | -0.00133  | -0.00138  | -0.00162  | -0.00138  | -0.00121  |
| 514 | -0.0011   | -0.00157  | -0.00162  | -0.00148  | -0.00157  | -0.00138  | -7.11E-04 |
| 515 | -0.00103  | -0.00114  | -0.00114  | -0.00129  | -0.00162  | -0.00143  | -7.63E-04 |
| 516 | 0.00129   | 0.003     | 0.00338   | 0.00333   | 0.00448   | 0.00505   | -0.00505  |
| 517 | -8.86E-04 | -3.81E-04 | -5.71E-04 | -3.33E-04 | -1.90E-04 | -5.71E-04 | -3.95E-04 |
| 518 | -4.43E-04 | -2.38E-04 | -3.33E-04 | -3.33E-04 | -2.86E-04 | -4.76E-04 | -1.05E-04 |
| 519 | -2.89E-04 | -9.52E-05 | -2.38E-04 | -1.90E-04 | -3.33E-04 | -2.86E-04 | -7.89E-05 |
| 520 | -8.46E-05 | -1.43E-04 | -4.76E-05 | 9.52E-05  | -2.45E-15 | -4.29E-04 | 8.88E-16  |
| 521 | -2.09E-04 | -2.38E-04 | -1.43E-04 | -4.76E-05 | -1.43E-04 | 4.76E-05  | -3.16E-04 |
| 522 | -1.04E-04 | -2.38E-04 | -3.33E-04 | -3.33E-04 | -4.29E-04 | -3.81E-04 | 1.05E-04  |
| 523 | -2.14E-04 | -3.81E-04 | -2.86E-04 | -1.69E-16 | -2.86E-04 | -9.52E-05 | -1.05E-04 |
| 524 | -3.53E-04 | -2.38E-04 | -4.76E-04 | -3.81E-04 | -5.24E-04 | -3.33E-04 | -2.89E-04 |
| 525 | -2.34E-04 | -2.86E-04 | -1.43E-04 | -9.52E-05 | -4.29E-04 | -9.52E-05 | -3.42E-04 |
| 526 | -3.53E-04 | -9.52E-05 | -1.90E-04 | 1.43E-04  | 9.52E-05  | 1.14E-15  | -2.11E-04 |

|     |        |           |           |           |           |          |           |
|-----|--------|-----------|-----------|-----------|-----------|----------|-----------|
| 527 | 0.0016 | -3.38E-16 | -1.18E-15 | -2.38E-04 | -6.77E-16 | 1.90E-04 | -2.89E-04 |
| 528 | —      | -0.00205  | -0.00252  | -0.002    | -0.0019   | -0.00262 | 6.05E-04  |

**Table S5. The per-residue energy contribution for all system C-RBD domains**

|         | WT         | Beta       | Kappa      | Delta      | Mu         |
|---------|------------|------------|------------|------------|------------|
| residue | energy     | energy     | energy     | energy     | energy     |
| number  | (kcal/mol) | (kcal/mol) | (kcal/mol) | (kcal/mol) | (kcal/mol) |
| 402     | 0.03195    | 0.03052    | 0.05286    | 0.07457    | 0.03557    |
| 403     | -5.53673   | 0.85896    | 1.35894    | -2.04619   | 0.72956    |
| 404     | 0.01962    | 0.04738    | 0.02267    | 0.02176    | 0.01571    |
| 405     | 0.96976    | 0.92569    | 0.70666    | 0.4481     | 1.26026    |
| 406     | 0.47264    | 0.5243     | 0.25911    | 0.94725    | 0.7246     |
| 407     | 0.01919    | 0.0271     | 0.02719    | -0.00157   | 0.02676    |
| 408     | 0.07494    | 0.30909    | 0.27062    | 0.14552    | 0.0162     |
| 409     | 0.10376    | 0.1299     | 0.15301    | 0.12238    | 0.10748    |
| 415     | 0.14914    | 0.24962    | 0.24074    | 0.21933    | 0.1831     |
| 416     | 0.08705    | 0.2893     | 0.16012    | 0.15387    | 0.15171    |
| 417     | 0.92864    | -0.16809   | 1.69502    | -0.66698   | 2.35013    |
| 418     | -0.08757   | -0.07457   | -0.08405   | -0.11281   | -0.06024   |
| 419     | 0.05195    | 0.05305    | 0.03014    | 0.05171    | 0.04576    |
| 444     | 0.24367    | 0.27229    | 0.12524    | 0.31919    | 0.47167    |
| 445     | 0.10607    | 0.17213    | 0.38101    | 0.29355    | 0.29043    |
| 446     | 0.16891    | 0.16459    | 0.01222    | -0.36297   | 0.06932    |
| 447     | 0.12759    | 0.13119    | 0.17369    | 0.01311    | 0.1376     |
| 448     | 0.08095    | 0.07571    | 0.1279     | 0.08086    | 0.0979     |
| 449     | 0.13031    | 0.33975    | 0.24612    | -0.10042   | 0.16399    |
| 450     | 0.09052    | 0.12129    | 0.12824    | 0.14281    | 0.14038    |
| 451     | 0.02152    | 0.00105    | 0.05305    | 0.01676    | 0.02329    |
| 452     | 0.04462    | 0.04986    | 0.3306     | 0.37343    | 0.05181    |
| 453     | 0.11217    | 0.06275    | -0.0821    | -0.85307   | 0.05935    |
| 454     | 0.69619    | 0.45957    | 0.35029    | 0.77862    | 0.47076    |
| 455     | -2.30363   | -1.42396   | -1.55756   | -3.83302   | -1.63082   |
| 456     | -2.14709   | -1.57019   | -1.43812   | -1.94566   | -1.50439   |
| 457     | 0.56106    | 0.58204    | 0.53662    | 0.54594    | 0.59283    |
| 458     | 0.41259    | 0.43529    | 0.30162    | 0.33365    | 0.32964    |
| 471     | 0.40403    | 0.3379     | 0.05395    | 0.35143    | 0.34371    |
| 472     | 0.024      | 0.00948    | 0.01133    | -0.01129   | 0.000286   |
| 473     | 0.13267    | 0.1533     | 0.01308    | -0.44993   | -0.29068   |
| 474     | 0.45505    | 0.23971    | 0.24657    | 0.27329    | 0.21508    |
| 475     | -0.2596    | -0.12924   | -0.17086   | -0.74436   | -0.13053   |
| 476     | -0.40245   | 0.11961    | 0.10185    | -0.69249   | 0.02591    |
| 477     | -0.65452   | 0.1883     | 0.14933    | -0.06888   | 0.20126    |

|     |          |          |          |          |          |
|-----|----------|----------|----------|----------|----------|
| 478 | 0.06372  | 0.18738  | 0.15186  | -0.35899 | 0.1191   |
| 479 | 0.03948  | 0.04995  | 0.0479   | 0.04978  | 0.04176  |
| 480 | 0.04357  | 0.02424  | 0.02395  | 0.02119  | 0.0191   |
| 481 | 0.15952  | 0.06114  | 0.06519  | 0.10581  | 0.05395  |
| 482 | 0.0799   | 0.04671  | 0.0839   | 0.08557  | 0.04838  |
| 483 | 0.05556  | 0.04052  | 0.02758  | 0.04395  | 0.04767  |
| 484 | 0.7172   | 0.62586  | -0.56797 | 1.42527  | 0.59095  |
| 485 | 0.20453  | 0.1264   | -0.84582 | 0.08196  | 0.16676  |
| 486 | -3.68562 | -4.2962  | -3.73149 | -7.38799 | -4.89712 |
| 487 | -0.97351 | -0.26955 | -0.84214 | -3.90715 | -0.16126 |
| 488 | -0.00992 | -0.04948 | -0.25514 | -0.2171  | -0.02457 |
| 489 | -0.61668 | -0.57251 | -1.81155 | -2.18944 | -1.50791 |
| 490 | 0.13314  | 0.16638  | 0.1089   | 0.17235  | 0.14533  |
| 491 | 0.013    | -0.09957 | -0.09086 | -0.28123 | -0.13843 |
| 492 | 0.12181  | 0.15333  | 0.20316  | 0.27645  | 0.1749   |
| 493 | 0.27998  | 0.31931  | -0.19615 | -1.46042 | -0.07288 |
| 494 | 0.19566  | 0.04614  | 0.26847  | 0.23334  | 0.07983  |
| 495 | 0.0379   | 0.04367  | 0.00644  | 0.0306   | 0.09055  |
| 496 | 0.11348  | 0.11656  | 0.17648  | -0.0856  | 0.04792  |
| 497 | -0.13814 | -0.12329 | -0.23886 | -0.24257 | -0.112   |
| 498 | -0.39508 | -0.52632 | -0.62009 | -2.51056 | -0.39359 |
| 499 | -0.01637 | -0.03342 | -0.09789 | -0.13414 | -0.01181 |
| 500 | 0.44582  | -0.64586 | -0.03415 | -0.3094  | -1.93851 |
| 501 | 0.21633  | -1.10418 | -3.07494 | -1.41866 | -2.68668 |
| 502 | -0.18966 | -0.83751 | -1.78131 | -0.96858 | -1.10453 |
| 503 | -0.01114 | -0.23627 | -0.14048 | 0.02519  | -0.05019 |
| 504 | -0.18764 | -0.37097 | -0.06568 | -0.07086 | 0.03107  |
| 505 | -2.00305 | -2.04549 | -3.33076 | -1.89596 | -1.93892 |

---

## REFERENCES

1. E. Wang, H. Sun, J. Wang, Z. Wang, H. Liu, J. Z. H. Zhang and T. Hou, *Chem. Rev.*, 2019, **119**, 9478-9508.
2. S. Genheden and U. Ryde, *Expert Opin Drug Discov*, 2015, **10**, 449-461.
3. M. Ylilauri and O. T. Pentikainen, *J Chem Inf Model*, 2013, **53**, 2626-2633.
4. T. Hou, J. Wang, Y. Li and W. Wang, *J Chem Inf Model*, 2011, **51**, 69-82.
